# Supplementary material
Source: HighWire-hosted journal article supplement (https://www.annfammed.org/highwire/filestream/7770/field_highwire_adjunct_files/0/Hroscikoski_Suppl_Table.pdf)
Supplement: Hroscikoski_Suppl_Table.pdf [file Hroscikoski_Suppl_Table.pdf]

# ANNALS OF FAMILY MEDICINE

## Online Supplementary Material

Hroschikoski MC, Solberg LI, Sperl-Hillen JM, Harper PG, McGrail M, Crabtree BF. The challenges of change: implementing the Chronic Care Model. *Ann Fam Med*. 2006;4:317-326.

<http://www.annfammed.org/cgi/content/full/4/4/317/DC1>

| <b>Supplemental Table. Example of Chronic Care Model (CCM) Implementation Scoring</b> |                                             |               |          |          |          |          |
|---------------------------------------------------------------------------------------|---------------------------------------------|---------------|----------|----------|----------|----------|
| <b>CCM Elements</b>                                                                   | <b>Components</b>                           | <b>Clinic</b> |          |          |          |          |
|                                                                                       |                                             | <b>1</b>      | <b>2</b> | <b>3</b> | <b>4</b> | <b>5</b> |
| Delivery system redesign                                                              | Care management roles                       | 0             | 1        | 1        | 1        | 2        |
|                                                                                       | Practice team                               | 1             | 2        | 2        | 2        | 2        |
|                                                                                       | Care delivery                               | 0             | 1        | 1        | 1        | 1        |
|                                                                                       | Proactive follow-up                         | 0             | 0        | 1        | 1        | 1        |
|                                                                                       | Planned visits                              | 1             | 1        | 0        | 1        | 2        |
|                                                                                       | Visit system changes                        | <u>0</u>      | <u>0</u> | <u>1</u> | <u>0</u> | <u>1</u> |
| Subtotal (12 points*)                                                                 |                                             | 2             | 5        | 6        | 6        | 9        |
| Self-management strategies                                                            | Patient education                           | 0             | 1        | 0        | 1        | 1        |
|                                                                                       | Patient activation/ psychosocial support    | 1             | 0        | 0        | 0        | 1        |
|                                                                                       | Self-management assessment                  | 0             | 0        | 1        | 0        | 1        |
|                                                                                       | Self-management support                     | 1             | 1        | 1        | 0        | 1        |
|                                                                                       | Collaborative decision making with patients | 0             | 0        | 0        | 0        | 0        |
|                                                                                       | Guidelines available to patients            | <u>0</u>      | <u>0</u> | <u>0</u> | <u>0</u> | <u>1</u> |
| Subtotal (12 points*)                                                                 |                                             | 2             | 2        | 2        | 1        | 5        |
| Decision support                                                                      | Care protocols, prompts                     | 0             | 1        | 1        | 1        | 1        |
|                                                                                       | Provider education                          | 0             | 1        | 1        | 0        | 1        |
|                                                                                       | Expert consultation support                 | <u>0</u>      | <u>0</u> | <u>1</u> | <u>0</u> | <u>1</u> |
| Subtotal (6 points*)                                                                  |                                             | 0             | 2        | 3        | 1        | 3        |
| Clinical Information systems                                                          | Patient registry system                     | 0             | 0        | 0        | 1        | 1        |
|                                                                                       | Use of information for care management      | 0             | 1        | 0        | 1        | 1        |
|                                                                                       | Provision of performance data               | <u>0</u>      | <u>0</u> | <u>0</u> | <u>0</u> | <u>2</u> |
| Subtotal (6 points*)                                                                  |                                             | 0             | 1        | 0        | 2        | 4        |
| Community linkages                                                                    | For patients                                | 0             | 0        | 0        | 0        | 0        |
|                                                                                       | For community                               | <u>0</u>      | <u>0</u> | <u>0</u> | <u>0</u> | <u>0</u> |
| Subtotal (4 points*)                                                                  |                                             | 0             | 0        | 0        | 0        | 0        |
| Health care organization                                                              | Leadership support                          | 0             | 0        | 0        | 0        | 1        |
|                                                                                       | Coherent system improvement                 | <u>1</u>      | <u>0</u> | <u>0</u> | <u>0</u> | <u>1</u> |
| Subtotal (6 points*)                                                                  |                                             | 1             | 0        | 0        | 1        | 2        |
| Total score (46 points*)                                                              |                                             | 5             | 10       | 11       | 11       | 23       |
| Note: Presence of component: 0 = none, 1 = some, 2 = substantial.                     |                                             |               |          |          |          |          |
| * Number of points possible for each column.                                          |                                             |               |          |          |          |          |
